# Supplementary material for: Edge-sharing water prisms
Source: Royal Society of Chemistry journal article supplement (doi:10.1039/d4cp00745j), 2024-01-01
Supplement: d4cp00745j1.pdf [file d4cp00745j1.pdf]

## **Supporting information for**

### **Edge-sharing water prisms**

Mikhail V. Kirov<sup>\*,a</sup>

*<sup>a</sup>Earth Cryosphere Institute, Tyumen Scientific Center Cryosphere SB RAS, Tyumen, 625000, Russia.*

*\*e-mail: [mikhail.v.kirov@gmail.com](mailto:mikhail.v.kirov@gmail.com)*

**Table S1.** The Cartesian coordinates for the lowest-energy configurations of edge-sharing water prisms. Here, the headlines indicate the number of molecules and the numbers of square, pentagonal and hexagonal prisms.

| <b>16-210</b> |             |             |             |
|---------------|-------------|-------------|-------------|
| O             | 2.59934703  | .77190366   | 1.39870920  |
| H             | 2.57401402  | 1.72795117  | 1.52447343  |
| H             | 1.70174066  | .48622757   | 1.61712475  |
| O             | 1.44543650  | 3.36320460  | 1.39422622  |
| H             | .49121458   | 3.19252149  | 1.46409133  |
| H             | 1.59593223  | 4.20512013  | 1.83045924  |
| O             | 1.39728996  | 3.08098320  | -1.43415699 |
| H             | 1.55051410  | 3.22854033  | -.49088969  |
| H             | 1.97453360  | 2.34732031  | -1.68000702 |
| O             | 2.82336882  | .57166921   | -1.35986705 |
| H             | 2.98483080  | -.34062900  | -1.63758062 |
| H             | 2.91445804  | .57320506   | -.39437580  |
| O             | 2.86542396  | -2.29579169 | -1.58976155 |
| H             | 2.85463249  | -2.35974091 | -.62211459  |
| H             | 3.60955620  | -2.82115049 | -1.89128880 |
| O             | 2.69120342  | -2.26085675 | 1.14760512  |
| H             | 2.84393656  | -1.36348776 | 1.46797384  |
| H             | 1.82108906  | -2.53638545 | 1.46467741  |
| O             | .05399821   | -.20161661  | 1.72966684  |
| H             | -.85914607  | .11703030   | 1.77684065  |
| H             | -.02527156  | -1.16600286 | 1.69194995  |
| O             | -2.62250266 | .35185463   | 1.42820800  |
| H             | -2.92040722 | -.53808962  | 1.65990845  |
| H             | -2.70406735 | .40604318   | .46401126   |
| O             | -1.26436310 | 2.96844280  | 1.25353579  |
| H             | -1.79242750 | 2.22406553  | 1.56620002  |
| H             | -1.43546758 | 3.03736163  | .30360555   |
| O             | -1.34512419 | 3.19068888  | -1.56629297 |
| H             | -.38057466  | 3.09216305  | -1.63262593 |
| H             | -1.54740052 | 4.04569631  | -1.95279145 |
| O             | -2.48571177 | .58567713   | -1.34925786 |
| H             | -2.59696076 | 1.50004579  | -1.63186800 |
| H             | -1.52759835 | .45290120   | -1.36874554 |
| O             | .16240761   | .06937821   | -1.00532215 |
| H             | 1.02325181  | .39086675   | -1.30571570 |
| H             | .22213571   | .07458049   | -.03865733  |
| O             | -.03672060  | -2.61367141 | -1.44575965 |
| H             | .82481848   | -2.88851781 | -1.78006135 |
| H             | .02710858   | -1.65037603 | -1.38126983 |
| O             | -2.90742531 | -2.25929668 | -1.25474131 |
| H             | -2.95006611 | -1.31647018 | -1.46470982 |
| H             | -2.02871238 | -2.55747202 | -1.52436439 |
| O             | -3.03890866 | -2.49441642 | 1.44493640  |
| H             | -3.09286539 | -2.48399290 | .47526389   |
| H             | -3.76962408 | -3.03520132 | 1.75336281  |
| O             | -.20751501  | -2.89442210 | 1.31850370  |
| H             | -1.13904548 | -2.97124939 | 1.56611737  |
| H             | -.19511675  | -2.93414307 | .35005256   |

18-120

|   |             |             |             |
|---|-------------|-------------|-------------|
| O | .16805205   | 2.69735152  | 1.35360599  |
| H | 1.09762255  | 2.77210202  | 1.61028943  |
| H | .16671012   | 2.73027590  | .38496985   |
| O | 2.98315597  | 2.57303540  | 1.59714131  |
| H | 3.32230766  | 1.66169115  | 1.61101329  |
| H | 3.59762109  | 3.08993251  | 2.12413889  |
| O | 2.80406027  | 2.56973249  | -1.24359252 |
| H | 2.87479554  | 2.73517711  | -.29372999  |
| H | 1.87046820  | 2.69285334  | -1.46187262 |
| O | -.04761459  | 2.47476259  | -1.39425775 |
| H | -.95031157  | 2.76778123  | -1.57766531 |
| H | -.07628794  | 1.51683451  | -1.53351887 |
| O | -2.85477331 | 2.64306831  | -1.51058718 |
| H | -3.18460386 | 1.72956559  | -1.55661989 |
| H | -3.48394781 | 3.17593448  | -2.00294147 |
| O | -2.71132543 | 2.52464157  | 1.34030108  |
| H | -1.79218844 | 2.65701794  | 1.60613691  |
| H | -2.73963578 | 2.72159293  | .39417936   |
| O | -.17481723  | -.01268520  | 1.24933264  |
| H | -.11513229  | .91677470   | 1.51064024  |
| H | -.17332391  | .00898542   | .28110646   |
| O | 1.83974572  | -1.85976525 | 1.50187070  |
| H | 1.15385711  | -1.17939650 | 1.56712023  |
| H | 1.36331571  | -2.69254598 | 1.64009204  |
| O | 3.94334147  | .03995539   | 1.33193136  |
| H | 3.36883007  | -.70206295  | 1.56470759  |
| H | 4.09329794  | -.03301133  | .38033649   |
| O | 3.97904083  | .13464245   | -1.53221224 |
| H | 3.54890027  | 1.00721621  | -1.53175413 |
| H | 4.76157295  | .22894522   | -2.08115187 |
| O | 2.07293951  | -1.89517115 | -1.22687003 |
| H | 2.80198248  | -1.31903503 | -1.50013794 |
| H | 2.10467389  | -1.89118043 | -.25608765  |
| O | -.14275275  | -.27453159  | -1.49880710 |
| H | .63318346   | -.85306265  | -1.53701004 |
| H | -.90237930  | -.87227365  | -1.55946807 |
| O | -2.08099580 | -2.20928759 | -1.28830660 |
| H | -1.50230191 | -2.94510469 | -1.52786902 |
| H | -2.13450217 | -2.22512483 | -.31992783  |
| O | -3.82100378 | .10036022   | -1.32947407 |
| H | -3.33532330 | -.69682734  | -1.57630368 |
| H | -4.00968404 | .00924296   | -.38519280  |
| O | -4.08124720 | .17026494   | 1.50323722  |
| H | -3.57430723 | .99812407   | 1.55832763  |
| H | -4.90788270 | .33617935   | 1.96281881  |
| O | -2.16201373 | -1.90053369 | 1.44908041  |
| H | -1.47525106 | -1.22376794 | 1.53436598  |
| H | -2.98429013 | -1.42352265 | 1.61932775  |
| O | -.03445974  | -3.89050785 | 1.36367340  |
| H | -.86610273  | -3.44117729 | 1.55757093  |
| H | -.02329635  | -4.04618713 | .41170999   |
| O | .19171387   | -3.92252990 | -1.53782041 |
| H | .93230278   | -3.29881215 | -1.59497152 |

H .43933747 -4.69087982 -2.05788233

**18-201**

O -2.71771418 -.16210697 1.29580838  
H -2.96528396 -1.05817159 1.56539467  
H -2.73076285 -.18197799 .32439198  
O -3.04829098 -2.97918134 1.41768062  
H -3.09159862 -3.00489134 .44704607  
H -3.74919033 -3.55256979 1.73663174  
O -2.88256969 -2.79282666 -1.26981527  
H -2.96643202 -1.85395025 -1.48799859  
H -1.98309236 -3.04094367 -1.52116873  
O -2.54428873 .02072473 -1.44464411  
H -2.78573338 .95657255 -1.52167578  
H -1.58479041 .01607494 -1.56935992  
O -2.64403008 2.74438542 -1.19939162  
H -2.68730084 2.83056893 -.23952794  
H -1.76536061 3.05350944 -1.45511717  
O -2.54764544 2.56286702 1.69479904  
H -2.70591156 1.60696175 1.72332362  
H -3.18030647 2.96263902 2.29647313  
O .02192864 -.40278256 1.54293932  
H -.89769418 -.11774298 1.63008297  
H -.02648424 -1.37026991 1.54938887  
O -.19625563 -3.11707532 1.29155102  
H -1.11498709 -3.26124776 1.55580425  
H -.19674778 -3.16547471 .32305183  
O 2.71182142 -2.76582527 1.22919554  
H 1.80827207 -2.96250452 1.50999663  
H 2.88381788 -1.84380007 1.46206285  
O 2.71256467 .14926217 1.36380740  
H 1.76160025 .09638735 1.53508453  
H 2.92947233 1.08154464 1.49791105  
O 2.84819506 -3.00559202 -1.48195026  
H 2.87183681 -3.01215675 -.51127670  
H 3.51658931 -3.62859838 -1.77603018  
O -.01096640 -2.89860495 -1.45951419  
H .88249784 -3.18235893 -1.69297669  
H .03255150 -1.93149894 -1.46816776  
O .20847741 -.17147297 -1.20719677  
H 1.11857784 .01068942 -1.47801068  
H .22729363 -.13712265 -.23956746  
O 2.94733439 -.14083720 -1.38037141  
H 3.04946541 -1.06672712 -1.63908623  
H 2.98705951 -.13505600 -.41157591  
O 2.48663838 2.67052813 -1.47530087  
H 2.73448267 1.76551294 -1.70326560  
H 2.69761945 2.76953549 -.53706934  
O -.00078484 3.77717231 -1.62994432  
H .85332439 3.31714958 -1.68886984  
H .10647456 4.58717026 -2.13483117  
O .04632477 3.71820792 1.19157089  
H -.75832923 3.27694649 1.49348187  
H -.06732655 3.83747700 .23875906

|   |            |            |            |
|---|------------|------------|------------|
| O | 2.65330592 | 2.95712616 | 1.36878203 |
| H | 1.71596529 | 3.20927990 | 1.42605501 |
| H | 3.14118488 | 3.64969508 | 1.82098904 |

**20-030**

|   |             |             |             |
|---|-------------|-------------|-------------|
| O | -4.22170471 | 1.33645913  | -1.56881642 |
| H | -4.13830726 | .36769367   | -1.57994422 |
| H | -4.96658450 | 1.54653203  | -2.13740153 |
| O | -4.02964406 | 1.43016580  | 1.28610314  |
| H | -4.18883443 | 1.55807292  | .34149248   |
| H | -3.18382003 | 1.86083679  | 1.47301180  |
| O | -1.60348259 | 2.29460855  | -1.32159589 |
| H | -2.51577549 | 2.09929453  | -1.57717204 |
| H | -1.61680920 | 2.34561256  | -.35361612  |
| O | -3.91389628 | -1.34345591 | -1.30409497 |
| H | -4.00196332 | -1.48073374 | -.35120756  |
| H | -3.06364372 | -1.73587786 | -1.54410855 |
| O | -3.99314993 | -1.26502624 | 1.55806357  |
| H | -4.02692391 | -.29319184  | 1.55986853  |
| H | -4.70803542 | -1.55521755 | 2.13007543  |
| O | -1.36675931 | 2.36069089  | 1.43344313  |
| H | -.82133779  | 1.56813104  | 1.54875498  |
| H | -.75923868  | 3.09730921  | 1.58956866  |
| O | .03410043   | .09633874   | -1.47134505 |
| H | -.56333494  | .85158434   | -1.58755264 |
| H | -.50767852  | -.69994491  | -1.58848087 |
| O | .72847053   | 3.94520425  | -1.34283127 |
| H | -.06813653  | 3.45043975  | -1.57682270 |
| H | .64274137   | 4.14501642  | -.40083548  |
| O | -1.25134130 | -2.32497170 | -1.32876088 |
| H | -.60927817  | -2.99630151 | -1.59979182 |
| H | -1.25847841 | -2.36162316 | -.36008305  |
| O | -1.32971468 | -2.16417403 | 1.42536737  |
| H | -2.25467027 | -1.94458813 | 1.60931153  |
| H | -.83816628  | -1.33752359 | 1.54599714  |
| O | .20504272   | .11403378   | 1.28143066  |
| H | 1.13698703  | .05363803   | 1.53658464  |
| H | .22190423   | .11220537   | .31222089   |
| O | .79055728   | 4.15303846  | 1.51057207  |
| H | 1.60347618  | 3.62160860  | 1.56098181  |
| H | .96219497   | 4.94701042  | 2.02295562  |
| O | 2.78500993  | .02841273   | -1.36667891 |
| H | 1.82763200  | .06271263   | -1.51369818 |
| H | 3.09200823  | .92753771   | -1.54894909 |
| O | 3.18797367  | 2.80386610  | -1.49753293 |
| H | 2.30755667  | 3.21353721  | -1.54910533 |
| H | 3.76903807  | 3.35846348  | -2.02394723 |
| O | .89800632   | -4.11915828 | -1.60157697 |
| H | 1.74268541  | -3.63758698 | -1.58073521 |
| H | 1.04056660  | -4.87730547 | -2.17354873 |
| O | .72728160   | -4.10433343 | 1.25183959  |
| H | -.03909929  | -3.55256339 | 1.46004508  |
| H | .68852650   | -4.25668663 | .29832080   |
| O | 2.92704226  | -.18281028  | 1.37623550  |

|   |            |             |             |
|---|------------|-------------|-------------|
| H | 3.11641827 | -1.09547005 | 1.63502298  |
| H | 2.97049873 | -.18042941  | .40789920   |
| O | 3.06314616 | 2.67357095  | 1.35734433  |
| H | 3.27161357 | 2.69312898  | .41340497   |
| H | 3.08558210 | 1.74068421  | 1.60905333  |
| O | 3.22679452 | -2.76746167 | -1.25424574 |
| H | 3.21081835 | -1.81932835 | -1.44386414 |
| H | 3.38352633 | -2.84180959 | -.30347055  |
| O | 3.17479168 | -2.97973579 | 1.59522465  |
| H | 2.29567440 | -3.39501644 | 1.57599639  |
| H | 3.72214152 | -3.54511461 | 2.14562340  |

### 20-111

|   |             |             |             |
|---|-------------|-------------|-------------|
| O | 3.65916705  | 1.80020518  | -1.18759174 |
| H | 3.82819864  | 1.80586549  | -.23615885  |
| H | 3.35008756  | .90777860   | -1.39533128 |
| O | 3.67678205  | 1.98128871  | 1.67389305  |
| H | 2.99204120  | 2.67141384  | 1.66489219  |
| H | 4.38883029  | 2.32330840  | 2.22004753  |
| O | 2.41661136  | -.72112687  | -1.37516756 |
| H | 1.48280196  | -.53307518  | -1.55474589 |
| H | 2.51589958  | -1.66650409 | -1.55771278 |
| O | 1.92567511  | 3.86193142  | -1.51013727 |
| H | 2.52797519  | 3.09897187  | -1.49785210 |
| H | 2.36775938  | 4.53184342  | -2.03767322 |
| O | 1.82009887  | 3.93291715  | 1.32449563  |
| H | 1.80783618  | 4.04676828  | .36421972   |
| H | .89259151   | 3.92887043  | 1.59367368  |
| O | 2.58373181  | -.58560030  | 1.37319019  |
| H | 3.02659972  | .22758964   | 1.65328500  |
| H | 2.62829487  | -.57909141  | .40492017   |
| O | -.30731663  | -.31546915  | -1.54984711 |
| H | -.88057675  | .46119835   | -1.62834262 |
| H | -.91835611  | -1.06424284 | -1.61883161 |
| O | 2.28441385  | -3.52239791 | -1.52805078 |
| H | 1.35134605  | -3.79194002 | -1.57631209 |
| H | 2.76973954  | -4.15409130 | -2.06461194 |
| O | -.90140862  | 4.02505289  | -1.20396405 |
| H | .02598094   | 3.87734647  | -1.43638641 |
| H | -1.38875902 | 3.23952642  | -1.48761127 |
| O | -1.03687470 | 4.13081860  | 1.49392831  |
| H | -1.04921910 | 4.19357371  | .52410522   |
| H | -1.43790165 | 4.93856349  | 1.82361577  |
| O | -.13472017  | -.32075622  | 1.21413811  |
| H | .78574690   | -.40894569  | 1.50094029  |
| H | -.08540974  | -.30845373  | .24626960   |
| O | 2.18961537  | -3.40817084 | 1.33196210  |
| H | 2.37271470  | -2.49401725 | 1.58726097  |
| H | 2.39084809  | -3.45807172 | .38776899   |
| O | -2.30778001 | 1.55641868  | -1.32688136 |
| H | -3.08854705 | 1.06577013  | -1.61770914 |
| H | -2.35046903 | 1.54943978  | -.35800273  |
| O | -2.29506401 | -2.20607792 | -1.37659752 |
| H | -3.08236194 | -1.71868072 | -1.65522547 |

|   |             |             |             |
|---|-------------|-------------|-------------|
| H | -2.34123982 | -2.23354746 | -.40819510  |
| O | -.32108205  | -4.26815521 | -1.36914976 |
| H | -1.02615909 | -3.65442959 | -1.61377591 |
| H | -.44250484  | -4.44087499 | -.42551311  |
| O | -2.14464376 | 1.54628807  | 1.44375339  |
| H | -1.83608076 | 2.43903300  | 1.65446207  |
| H | -1.36930145 | .97350021   | 1.54308480  |
| O | -2.06718823 | -2.27054889 | 1.37239032  |
| H | -1.36220595 | -1.61222598 | 1.46355839  |
| H | -1.63417186 | -3.11747785 | 1.54675090  |
| O | -.30886638  | -4.46153901 | 1.48163715  |
| H | .58650429   | -4.08586596 | 1.53517972  |
| H | -.28802534  | -5.26983980 | 1.99980749  |
| O | -4.43132745 | -.33393660  | -1.50330097 |
| H | -4.49510228 | -.35523092  | -.53370613  |
| H | -5.33162854 | -.33171536  | -1.83644958 |
| O | -4.20098195 | -.39089460  | 1.18642530  |
| H | -3.66036076 | .37537005   | 1.42216522  |
| H | -3.66166254 | -1.16215000 | 1.40660351  |

### 22-021

|   |             |             |             |
|---|-------------|-------------|-------------|
| O | 2.37338062  | .69090097   | 1.42287399  |
| H | 2.99257782  | -.03157519  | 1.60549896  |
| H | 1.48858186  | .32458698   | 1.57549336  |
| O | 4.11887641  | -1.50483682 | 1.57475268  |
| H | 3.64360511  | -2.35305747 | 1.56916182  |
| H | 4.86305463  | -1.62233130 | 2.17053087  |
| O | 2.51376743  | 3.49626832  | 1.22160569  |
| H | 2.52364924  | 2.55266307  | 1.43375019  |
| H | 2.63525920  | 3.55049992  | .26470959   |
| O | -.19382342  | -.32283284  | 1.30324277  |
| H | -.99719756  | .14797244   | 1.57114658  |
| H | -.21503466  | -.29873086  | .33441362   |
| O | 4.11323355  | -1.38124892 | -1.28879085 |
| H | 4.26532715  | -1.32046152 | -.33617324  |
| H | 3.57893671  | -.60735391  | -1.51404435 |
| O | 2.72381616  | -3.80245550 | 1.28621139  |
| H | 1.78280066  | -3.66890730 | 1.46706628  |
| H | 2.78797289  | -3.99161777 | .34071131   |
| O | 2.35367370  | 3.63443239  | -1.64154695 |
| H | 1.47356473  | 4.04509745  | -1.59374262 |
| H | 2.87673399  | 4.20069822  | -2.21428731 |
| O | .22052459   | 4.89200882  | 1.60181765  |
| H | 1.04203873  | 4.37302326  | 1.57859711  |
| H | .41488727   | 5.66697142  | 2.13458831  |
| O | -2.57247517 | 1.02640954  | 1.38232388  |
| H | -2.56655045 | 1.95781126  | 1.65183820  |
| H | -2.59828354 | 1.05713543  | .41520663   |
| O | .01458861   | -3.06147615 | 1.43756841  |
| H | -.05695372  | -2.10226404 | 1.55928341  |
| H | -.87784921  | -3.39959847 | 1.60046058  |
| O | 2.37962764  | .84887525   | -1.33101719 |
| H | 2.41547214  | 1.77594320  | -1.60697652 |
| H | 2.39828145  | .87524438   | -.36209515  |

|   |             |             |             |
|---|-------------|-------------|-------------|
| O | 2.92762797  | -3.79724138 | -1.57299132 |
| H | 3.38889200  | -2.94121037 | -1.57534938 |
| H | 3.42595666  | -4.37111448 | -2.15994782 |
| O | -.04659596  | 4.81669458  | -1.21081339 |
| H | -.03483302  | 4.97477881  | -.25692392  |
| H | -.89387991  | 4.38788794  | -1.39003673 |
| O | -2.39879653 | 3.75777360  | 1.46947867  |
| H | -1.51147460 | 4.10280563  | 1.63191024  |
| H | -2.55802441 | 3.86858614  | .52441238   |
| O | -4.06309419 | -1.35998875 | 1.35898574  |
| H | -3.61447446 | -.53604147  | 1.59574563  |
| H | -4.25262053 | -1.28670355 | .41441220   |
| O | -2.71120807 | -3.69658731 | 1.54280601  |
| H | -3.20796843 | -2.86124569 | 1.58114854  |
| H | -3.19405371 | -4.31644739 | 2.09521328  |
| O | -.07533265  | -.38535609  | -1.47054243 |
| H | .79993814   | .01422369   | -1.59720005 |
| H | .05156781   | -1.34094510 | -1.58058866 |
| O | .22930090   | -3.11611092 | -1.31209102 |
| H | 1.09604625  | -3.45619455 | -1.57499630 |
| H | .22495615   | -3.15876257 | -.34361513  |
| O | -2.61695737 | 3.60181624  | -1.40020603 |
| H | -2.63988396 | 2.63673147  | -1.49873825 |
| H | -3.32001636 | 3.94692595  | -1.95578588 |
| O | -4.15630822 | -1.41745045 | -1.51782396 |
| H | -3.59217053 | -2.20937233 | -1.54081156 |
| H | -4.91146391 | -1.61645026 | -2.07693831 |
| O | -2.56500434 | -3.59578607 | -1.31342481 |
| H | -2.58727198 | -3.80316147 | -.36930768  |
| H | -1.62903448 | -3.49845834 | -1.53558142 |
| O | -2.53127574 | .85213126   | -1.40182898 |
| H | -1.66146491 | .44486058   | -1.54210588 |
| H | -3.16526172 | .13533487   | -1.55539209 |

**22-102**

|   |             |             |             |
|---|-------------|-------------|-------------|
| O | -.02828076  | 2.30564646  | 1.38020547  |
| H | .85947546   | 2.63820239  | 1.57968542  |
| H | .00934119   | 1.35284617  | 1.55780937  |
| O | 2.62890716  | 3.19021421  | 1.58535887  |
| H | 3.33183683  | 2.51863772  | 1.59907001  |
| H | 2.95437450  | 3.91951895  | 2.11905409  |
| O | .05150401   | -.45385832  | 1.49639999  |
| H | .81748687   | -1.03759580 | 1.60817913  |
| H | -.71979968  | -1.03643088 | 1.58090881  |
| O | -2.63815902 | 3.35609110  | 1.22942870  |
| H | -1.74040535 | 3.05464622  | 1.42675780  |
| H | -2.65838183 | 3.51356341  | .27637503   |
| O | 4.63858362  | 1.39066859  | 1.31088301  |
| H | 4.64410520  | .46712599   | 1.59397337  |
| H | 4.77403572  | 1.36656498  | .35368784   |
| O | 2.52645013  | 3.14598620  | -1.28331780 |
| H | 2.49531525  | 3.31126928  | -.33148938  |
| H | 1.61622570  | 2.94530934  | -1.53969107 |
| O | 2.12270472  | -2.26126668 | 1.34173269  |



|   |             |             |             |
|---|-------------|-------------|-------------|
| H | 3.01388799  | -2.04641200 | 1.64963967  |
| H | 2.18533974  | -2.26893148 | .37438289   |
| O | -2.03718482 | -2.21258939 | 1.28218206  |
| H | -2.92129563 | -1.91479306 | 1.54690504  |
| H | -2.07159914 | -2.23333921 | .31537173   |
| O | -4.72775305 | 1.66301979  | 1.57698232  |
| H | -3.95814443 | 2.25675798  | 1.56587371  |
| H | -5.38797557 | 2.10066342  | 2.11999389  |
| O | -2.86047608 | 3.33474001  | -1.63187270 |
| H | -3.53343834 | 2.63369387  | -1.60035199 |
| H | -3.23321648 | 4.03237809  | -2.17648279 |
| O | 4.80707852  | -1.45465867 | 1.53483363  |
| H | 4.86513999  | -1.50080048 | .56565705   |
| H | 5.57316906  | -1.92091474 | 1.87765597  |
| O | 4.62161083  | 1.44183570  | -1.52871028 |
| H | 3.83971136  | 2.01918126  | -1.55010985 |
| H | 5.28688332  | 1.88732814  | -2.05920938 |
| O | -.21130410  | 2.45022775  | -1.35961820 |
| H | -1.07521091 | 2.79466735  | -1.62667813 |
| H | -.21989437  | 2.46871423  | -.39033037  |
| O | .00924068   | -4.15701049 | 1.30515021  |
| H | .78504996   | -3.62705762 | 1.53350991  |
| H | -.75894216  | -3.61117173 | 1.52374471  |
| O | -4.56554492 | -1.17989776 | 1.38352483  |
| H | -4.58933666 | -.23100769  | 1.56253982  |
| H | -4.72470494 | -1.27672589 | .43685547   |
| O | -4.75910481 | 1.43749122  | -1.23969672 |
| H | -4.89870944 | 1.48286508  | -.28393505  |
| H | -4.64173384 | .49929245   | -1.43911681 |
| O | 4.63861574  | -1.37562737 | -1.15197862 |
| H | 4.59786614  | -.44097363  | -1.39773937 |
| H | 3.78552410  | -1.75473344 | -1.40453767 |
| O | .06309815   | -.27280663  | -1.25816812 |
| H | -.00062413  | .65313242   | -1.53599257 |
| H | .06383396   | -.23292897  | -.28868265  |
| O | .01547864   | -4.31262915 | -1.39151291 |
| H | .01291073   | -4.37836107 | -.42077084  |
| H | .01689677   | -5.21492117 | -1.72052978 |
| O | -4.49022092 | -1.39476257 | -1.48984039 |
| H | -3.59148694 | -1.74196540 | -1.60365732 |
| H | -5.05812729 | -1.92328794 | -2.05578030 |
| O | 1.96826411  | -2.25345008 | -1.44315547 |
| H | 1.36289446  | -1.50383429 | -1.54503425 |
| H | 1.42711686  | -3.03790495 | -1.60877383 |
| O | -1.85446081 | -2.20885448 | -1.53251187 |
| H | -1.21400219 | -1.48172015 | -1.57994999 |
| H | -1.32601032 | -3.01053215 | -1.65844266 |

**24-012**

|   |             |            |            |
|---|-------------|------------|------------|
| O | .06312175   | 2.35337551 | 1.42251558 |
| H | -.80517915  | 2.74037308 | 1.61071277 |
| H | -.03704575  | 1.40060810 | 1.57229605 |
| O | -2.47218769 | 3.53145689 | 1.62966985 |
| H | -3.27715664 | 2.98620098 | 1.63841279 |

|   |             |             |             |
|---|-------------|-------------|-------------|
| H | -2.67342927 | 4.30105525  | 2.16813759  |
| O | -.21502529  | -.39584956  | 1.30096073  |
| H | -1.01708034 | -.86533523  | 1.57351166  |
| H | -.24167754  | -.40736666  | .33151352   |
| O | 2.54452411  | 3.65417519  | 1.20613036  |
| H | 1.70217249  | 3.22800097  | 1.41799515  |
| H | 2.51522974  | 3.83530024  | .25741821   |
| O | -4.74214455 | 2.08386101  | 1.35616674  |
| H | -4.84574883 | 1.16334394  | 1.63053826  |
| H | -4.88047956 | 2.08386248  | .39898813   |
| O | -2.36819379 | 3.48523417  | -1.23791400 |
| H | -2.31765208 | 3.64281304  | -.28575179  |
| H | -1.50661645 | 3.12223008  | -1.48433974 |
| O | -2.57390496 | -1.82623576 | 1.41643783  |
| H | -3.42570719 | -1.48608301 | 1.72253317  |
| H | -2.62667506 | -1.80534768 | .44835757   |
| O | 2.23257065  | -1.69346944 | 1.39582644  |
| H | 1.41141697  | -1.19990873 | 1.54305038  |
| H | 1.99950344  | -2.62029135 | 1.55365380  |
| O | 4.82617129  | 2.22777046  | 1.47387290  |
| H | 3.99583605  | 2.73301967  | 1.48580708  |
| H | 5.42702453  | 2.69641658  | 2.05831418  |
| O | 2.69124593  | 3.72084641  | -1.65548358 |
| H | 3.48581908  | 3.16067109  | -1.66006258 |
| H | 2.89966655  | 4.47739513  | -2.20916625 |
| O | -5.15975067 | -.72497712  | 1.58082313  |
| H | -5.20329015 | -.77183735  | .61076326   |
| H | -5.96600707 | -1.12872579 | 1.91048579  |
| O | -4.70043926 | 2.12971242  | -1.48420719 |
| H | -3.84416260 | 2.58923381  | -1.50808420 |
| H | -5.28820357 | 2.64407817  | -2.04301847 |
| O | .23501036   | 2.40995025  | -1.33342254 |
| H | 1.04804035  | 2.85935151  | -1.60485839 |
| H | .24837109   | 2.42654099  | -.36439172  |
| O | -1.35172938 | -4.35798349 | 1.33437455  |
| H | -1.80085863 | -3.53205636 | 1.56149136  |
| H | -1.50397213 | -4.48124767 | .38792062   |
| O | 1.34276350  | -4.34806151 | 1.53742910  |
| H | .37102394   | -4.37294245 | 1.56595287  |
| H | 1.64264246  | -5.05309167 | 2.11665710  |
| O | 4.80913271  | -.58410934  | 1.11766549  |
| H | 3.95079525  | -.95516618  | 1.36729277  |
| H | 4.78160680  | .35090049   | 1.36393814  |
| O | 4.89996349  | 2.18323472  | -1.36760012 |
| H | 5.03299990  | 2.18135340  | -.40974147  |
| H | 4.91047938  | 1.25353026  | -1.62986679 |
| O | -4.94322408 | -.67209458  | -1.09980617 |
| H | -4.83765926 | .25590196   | -1.35082117 |
| H | -4.11028392 | -1.10696249 | -1.33101792 |
| O | -.09445097  | -.32791358  | -1.47474332 |
| H | .02357641   | .62484819   | -1.61414382 |
| H | .77879739   | -.72501164  | -1.61900281 |
| O | -1.33948442 | -4.43836233 | -1.53222275 |
| H | -.36919988  | -4.38110141 | -1.56026773 |

|   |             |             |             |
|---|-------------|-------------|-------------|
| H | -1.58053192 | -5.15188360 | -2.12821070 |
| O | 1.34496940  | -4.21418919 | -1.32364793 |
| H | 1.50591857  | -4.34392001 | -.37956722  |
| H | 1.71434796  | -3.34445299 | -1.52967795 |
| O | 5.00806139  | -.65559474  | -1.56257524 |
| H | 5.05038990  | -.70429018  | -.59256492  |
| H | 5.76421373  | -1.14565773 | -1.89414735 |
| O | -2.40288702 | -1.85334332 | -1.33220689 |
| H | -1.62945466 | -1.29600895 | -1.51070578 |
| H | -2.11128680 | -2.75769399 | -1.52042256 |
| O | 2.36224813  | -1.59288771 | -1.36513001 |
| H | 3.22424527  | -1.27921282 | -1.67179669 |
| H | 2.41888028  | -1.58052509 | -.39702723  |

### 26-003

|   |             |             |             |
|---|-------------|-------------|-------------|
| O | .13894608   | -.09307371  | -1.45680812 |
| H | -.62758242  | .47968154   | -1.61675935 |
| H | .91611913   | .47158876   | -1.58523141 |
| O | -2.09497189 | 1.54654749  | -1.39219542 |
| H | -2.17913645 | 2.46075393  | -1.69615654 |
| H | -2.11218691 | 1.59914787  | -.42400410  |
| O | 2.36795191  | 1.58528715  | -1.27657714 |
| H | 2.34738387  | 2.51854865  | -1.53580344 |
| H | 2.31992966  | 1.59465651  | -.30668139  |
| O | -.04352885  | -2.86817838 | -1.30323991 |
| H | .04677434   | -1.92258484 | -1.50020761 |
| H | .81573993   | -3.26635248 | -1.50942870 |
| O | -2.50036668 | 4.32805148  | -1.60443448 |
| H | -2.58785632 | 4.34587062  | -.63636312  |
| H | -3.29914634 | 4.72654038  | -1.95816773 |
| O | .00272678   | 5.64265016  | -1.36018583 |
| H | -.81300176  | 5.20042177  | -1.62969576 |
| H | -.07905949  | 5.77350756  | -.40532008  |
| O | 2.36311130  | 4.35805189  | -1.61286024 |
| H | 1.50654181  | 4.81812826  | -1.61739867 |
| H | 2.95050026  | 4.89873716  | -2.14650503 |
| O | -4.45607676 | .01767258   | -1.27043294 |
| H | -3.64603284 | .48810678   | -1.50947321 |
| H | -4.55823678 | .15060206   | -.31855557  |
| O | -4.70352720 | -2.66488484 | -1.51499174 |
| H | -4.59504621 | -1.69933031 | -1.54008659 |
| H | -5.44109490 | -2.86179204 | -2.09756984 |
| O | -2.44332929 | -4.32526140 | -1.11767865 |
| H | -1.63922471 | -3.82989407 | -1.32871878 |
| H | -3.18315914 | -3.75786466 | -1.37450517 |
| O | 2.43414138  | -4.14529600 | -1.55686990 |
| H | 3.24734657  | -3.61337789 | -1.52927382 |
| H | 2.61675376  | -4.87350299 | -2.15599575 |
| O | 4.68132407  | -2.68975691 | -1.19696008 |
| H | 4.66472651  | -1.74364580 | -1.39322808 |
| H | 4.82837211  | -2.75590489 | -.24348529  |
| O | 4.69123190  | .13721269   | -1.46795354 |
| H | 3.86685842  | .64518036   | -1.53230791 |
| H | 5.34600278  | .61910454   | -1.97894118 |

|   |             |             |            |
|---|-------------|-------------|------------|
| O | .04598636   | -.24055740  | 1.33589027 |
| H | -.02005145  | -1.16489189 | 1.61699055 |
| H | .08321750   | -.27687916  | .36768071  |
| O | -2.17244724 | 1.42336964  | 1.36531072 |
| H | -1.40663211 | .85588837   | 1.54461289 |
| H | -2.95344690 | .88243251   | 1.55687208 |
| O | 2.28957647  | 1.41828719  | 1.45705291 |
| H | 1.53365935  | .83629762   | 1.62910012 |
| H | 3.08087069  | .87407481   | 1.60582494 |
| O | -.20147654  | -3.00555833 | 1.44513561 |
| H | -.98768919  | -3.49377464 | 1.72479271 |
| H | -.23308431  | -3.00549283 | .47623361  |
| O | -2.40406255 | 4.21359769  | 1.07792621 |
| H | -2.29321567 | 3.28529608  | 1.32835586 |
| H | -1.58940683 | 4.66380393  | 1.34099961 |
| O | .01769092   | 5.61692474  | 1.48077212 |
| H | .84172940   | 5.10227468  | 1.51349222 |
| H | .14342412   | 6.35362204  | 2.08384460 |
| O | 2.31115088  | 4.21032656  | 1.26287406 |
| H | 2.51335652  | 4.26327347  | .32008350  |
| H | 2.30455932  | 3.26608005  | 1.47618673 |
| O | -4.55720850 | -.03333340  | 1.59029707 |
| H | -4.59349025 | -1.00480388 | 1.60268396 |
| H | -5.29383672 | .26156210   | 2.13178731 |
| O | -4.71499695 | -2.71952743 | 1.32990312 |
| H | -4.79408427 | -2.83679122 | .37326714  |
| H | -3.99778498 | -3.30678786 | 1.60221231 |
| O | -2.55745476 | -4.54986211 | 1.55994951 |
| H | -2.52184902 | -4.60835657 | .59024994  |
| H | -2.62436339 | -5.45039204 | 1.88616329 |
| O | 2.31149098  | -4.24829654 | 1.31224919 |
| H | 2.26805587  | -4.36840839 | .35443690  |
| H | 1.47855365  | -3.82131649 | 1.55521356 |
| O | 4.63212141  | -2.89936064 | 1.62644427 |
| H | 3.79080372  | -3.38613802 | 1.62774247 |
| H | 5.22429202  | -3.39440204 | 2.19784843 |
| O | 4.58342415  | -.07455560  | 1.40672335 |
| H | 4.78762759  | -.00131443  | .46650765  |
| H | 4.57341487  | -1.02065238 | 1.60137923 |
